# Supplementary material for: Development of UI-WRF-Chem (v1.0) for the MAIA satellite mission: case demonstration
Source: Copernicus journal article supplement (doi:10.5194/egusphere-2025-1360), 2025-05-05
Supplement: Supplementary file [file egusphere-2025-1360-AC1-supplement.pdf]

## Response to the reviewers:

We sincerely thank the reviewers for the time and efforts to review our manuscript and providing constructive feedback to improve our manuscript. We have revised the manuscript following the suggestions. Below are the point-by-point responses with the original comments in black and our responses in blue.

### RC 1:

This paper focuses on the development of a Unified Inputs for WRF-Chem (UIWRF-Chem) system to support the MAIA satellite mission. The authors propose a framework that integrates NASA's GEOS-FP and MERRA-2 as initial and boundary conditions, incorporates a stand-alone emissions preprocessor, updates land surface properties, and implements a new NO<sub>x</sub> emission scheme. They test the system's performance across four MAIA target cities.

Overall, this is a solid and technically sound study. The authors demonstrate a good understanding of the different options available in WRF-Chem and the key differences among them. However, the manuscript currently suffers from a lack of clarity, particularly in the Introduction and Model Description sections. I recommend major revisions before it can be considered for publication.

Response: We thank the reviewer for taking the time to review our manuscript and we truly appreciate the efforts. We are also grateful for the valuable feedback to improve our manuscript.

General Comments:

1. Clarify the link to MAIA mission needs. Since the core purpose of this study is to support the MAIA mission, the paper should better articulate MAIA's specific modeling requirements—e.g., what variables are most relevant, what forecast capabilities are needed, and how UIWRF-Chem is designed to meet those needs.

Response: Thanks for the valuable feedback and we agree it would be beneficial to clarify the link to the MAIA mission needs. We have added subsection 2.1 to describe the MAIA PM products and what are needed from UI-WRF-Chem to generate the PM products. We have then added subsection 2.2 to provide an overview of the UI-WRF-Chem modeling framework and how it is designed to meet those needs.

2. Improve the Introduction. The rationale for modifying WRF-Chem is not clearly laid out. The authors should explain why it is necessary to update land surface properties, emissions modules, and boundary/initial conditions in the context of MAIA. A clearer articulation of these needs would better frame the scientific motivation.

Response: Thanks for the suggestion. We have revised the introduction to better clarify the role of UI-WRF-Chem in the MAIA satellite mission as well as the motivation for our major updates in UI-WRF-Chem to ensure that they align with the goal.

3. Reorganize the Model Description section. The current presentation of model improvements is confusing. I suggest breaking it into clearly labeled subsections, each focused on a single enhancement (e.g., emissions, boundary conditions, NO<sub>x</sub> scheme, land surface update).

Response: Thanks for the suggestion to improve the Model Description Section. We agree clarification is needed and have reorganized the section following the suggestion. We first added section 2.1 to provide an overview of the MAIA PM products and identify variables required from UI-WRF-Chem outputs to generate these products. We next added section 2.2 to provide an overview of the UI-WRF-Chem modeling framework, explain the motivation of the model updates and highlight the novelty of developments in the current work. We then have each of the model improvement as a subsection:

2.3 Updates of meteorological and chemical initial and boundary conditions as well as soil properties;

2.4 Updates of land surface properties;

2.5 Development of BDISNP soil NO<sub>x</sub> emission scheme;

2.6 Development of WRF-Chem Emission Preprocessing System (WEPS);

2.7 Updates of WRF-Chem Chemistry scheme;

2.8 Postprocessing and evaluation codes, and repository management.

4. Quantify significance of improvements. While the paper compares results from different modeling schemes, it does not provide evidence of whether the differences are statistically significant or robust across other regions or time periods.

Response: Thank you for the suggestion and we agree that it is valuable to show whether the differences are statistically significant or not. We have added Sect 3.1 to describe the methods used to test the significance and show the significance test results for the case studies conducted.

#### Specific Comments:

1. Why use WRF-Chem v3.8.1? Given that WRF-Chem versions above 4.0 are now available (with improvements such as subgrid-scale chemical transport for KF and GF schemes), the authors should justify why UIWRF-Chem is based on v3.8.1. Even though they mention plans to test GF in the future, a more detailed explanation is needed.

Response: Thanks for bringing up this important point. The model development presented in this paper spanned several years, during which WRF-Chem v3.8.1 was selected as the base version due to its stability and widespread use at the time. While the newer versions of WRF-Chem (v4.0 or above) include updates relevant to this work such as the subgrid-scale chemical transport using the KF or GF scheme, we have kept the WRF-Chem v3.8.1 throughout the development to ensure consistency and reproducibility.

of the results. We also note that only the GF scheme can ensure the consistency of the transport of the chemical species and other scalars. Although the KF scheme is widely used and advanced, it has not yet been updated to support the consistent transport of chemical species and other scalars using the same scheme. Nevertheless, we acknowledge the limitation of using an older version and recognize the benefits introduced in the newer versions. We plan to update the UI-WRF-Chem system with a newer version to incorporate these improvements in the future work.

We have made some revisions and added one paragraph in Sect 3 to provide more detailed explanation as follows:

*With the current version (WRF-Chem v3.8.1) of the code, chemical species are transported using the G3D scheme, regardless of which cumulus scheme is used, while other scalars are transported with the selected cumulus scheme. Therefore, the G3D scheme is used to ensure the consistency between chemistry and physics. Additionally, WRF-Chem v3.8.1 was selected as the base version at the beginning of this project due to its stability. We have maintained this version over the course of the project to ensure the consistency and reproducibility of the results. Although there are several scale-aware cumulus schemes available in WRF-Chem such as the Kain-Fritsch scheme (KF, (Kain, 2004)) and the Grell-Freitas scheme (GF, (Grell and Freitas, 2014)), only the GF scheme has been updated to ensure the consistent transport of both chemical species and other scalars, as described by Li et al. (2018, 2019). We acknowledge the limitation of using only the G3D scheme in this work and plan to update the UI-WRF-Chem modelling framework to a newer version to enable the use of the GF scheme and incorporate other recent improvements as well.*

2. Summarize model setup in a table. Please consider adding a summary table listing the model configuration (e.g., resolution, land surface model, physics schemes, emissions setup, etc.), or update Table S2 accordingly.

Response: Thanks for the suggestion and we have added Table 1 to summarize the model set up for the four target areas.

Table 1. A summary of model physics, chemistry and emissions configurations for CHN-Beijing, ITA-Rome, USA-LosAngeles, and USA-Atlanta target areas.

| Category  | Model component            | CHN-Beijing                    | ITA-Rome       | USA-Los Angeles | USA-Atlanta |
|-----------|----------------------------|--------------------------------|----------------|-----------------|-------------|
| Physics   | Microphysics               | Lin                            | Morrison       | Lin             | Lin         |
|           | Cumulus                    | G3D                            | G3D            | G3D             | G3D         |
|           | Longwave radiation         | RRTMG                          | RRTMG          | RRTMG           | RRTMG       |
|           | Shortwave radiation        | RRTMG                          | RRTMG          | RRTMG           | RRTMG       |
|           | Planetary boundary layer   | YSU                            | YSU            | YSU             | YSU         |
|           | Surface layer              | Revised MM5                    |                |                 |             |
|           | Land surface model         | NOAH                           | NOAH           | NOAH            | NOAH        |
| Chemistry | Gas-phase                  | RADM2                          | RADM2          | RADM2           | RADM2       |
|           | Aerosols                   | MADE/SORAGM-DustSS             |                |                 |             |
|           | Photolysis                 | Madronich F-TUV                |                |                 |             |
| Emissions | Anthropogenic emissions    | MEIC 2016                      | HTAP v3 (2018) | NEI 2017        | NEI 2017    |
|           | Dust emissions             | GOCART with AFWA modifications |                |                 |             |
|           | Biogenic emissions of VOCs | MEGAN                          | MEGAN          | MEGAN           | MEGAN       |
|           | Soil NOx emissions         | BDISNP                         | BDISNP         | BDISNP          | BDISNP      |
|           | Wildfire emissions         | FLAMBE                         | FLAMBE         | FLAMBE          | FLAMBE      |

- Highlight novelty of new modules. Some of the newly added components appear to be simple integrations into WRF-Chem rather than innovations. The paper should more clearly highlight what is original and novel in this system.

Response: We appreciate the suggestion and agree that highlighting the originality of our work is important. We have added subsection 2.2 to provide an overview of the UI-WRF-Chem modeling framework and clearly outline the novelty of the new modules we have developed. In addition, we have included a flowchart of the UI-WRF-Chem modeling framework (Fig 1) to visually emphasize these updates.

## 2.2 Overview of UI-WRF-Chem modelling framework

*To meet these needs, UI-WRF-Chem is designed to operate in both forecasting (or near real time, NRT) and reanalysis modes. We use the NASA GEOS model data: GEOS FP in forecasting or NRT mode and MERRA-2 in reanalysis mode to drive WRF-Chem simulations by providing self-consistent and unified meteorological and chemical initial*

*and boundary conditions, referred to as the Unified Inputs (of initial and boundary conditions) for meteorology and chemistry. Figure 1 presents the flowchart of the UI-WRF-Chem modeling framework. Here, we provide a brief description of the UI-WRF-Chem framework, outline the components included in the standard WRF-Chem model and highlight the major updates we have introduced.*

*Compared with the standard WRF-Chem model, the UI-WRF-Chem modeling framework incorporates new modules and significant modifications to enable the seamless use of NASA GEOS data, updates of land surface properties with recent available MODIS land data and expanded emission capabilities. First, we incorporate the GEOS2WRF module from NASA'S Unified-Weather Research and Forecasting model (NU-WRF) (Peters-Lidard et al., 2015), which functions similarly to the standard ungrib process, by converting GEOS FP or MERRA-2 data to an intermediate file format. We also develop the LDAS2WRF module, adapted from the GEOS2WRF module to convert the GLDAS or NLDAS data into the same intermediate file format. The standard metgrid process then converts these intermediate files into meteorological files in the NetCDF format (met\_em.d\*.nc), respectively. These two NetCDF files are subsequently merged to generate the final meteorological files for the real process. Second, to integrate the MODIS land data into the static geographical datasets, we develop the conv\_geo Python-based module, where we convert the MODIS land data into the standard binary file formats required by the geogrid process. This enables updates of land surface properties with recent available MODIS land data, not available in the standard WRF-Chem model. Additionally, we develop the GEOSBC module, by modifying the standard mozbc module to use GEOS FP or MERRA-2 data for updating both chemical initial and boundary conditions, which improves the consistency between meteorology and chemistry inputs. Additionally, we modify WRF-Chem's chemistry scheme to ensure compatibility between dust fields from GEOS FP and MERRA-2 and the dust representation in the chemistry scheme itself (see Sect 2.7 for more information).*

*For emissions, we develop the BDISNP scheme for soil NO<sub>x</sub> emissions by extending the workflow of the standard MEGAN-based biogenic VOC calculation. Similar to the MEGAN process, we first use the standard bio\_emiss module to read the MEGAN emission input datasets (e.g., isoprene emission factor) and then convert them into the wrfbiochemi\_d0\* files for the real process. We then apply the add\_fert module that we have developed here to incorporate emission input datasets (e.g., fertilizer data), specific to the BDISNP scheme into wrfbiochemi\_d0\* files. Additionally, we modify WRF-Chem codes to calculate soil NO<sub>x</sub> emissions. We also develop the WEPS module to process both anthropogenic and fire emissions, adopting some functionalities from the widely used anthro\_emiss and EPA\_ANTHRO\_EMISS utilities in the WRF-Chem community. This provides flexibility for incorporating additional emission inventories into the WEPS. Lastly, we develop a Python-based postprocessing module to calculate selected WRF-Chem variables and compile hourly WRF-Chem output files into daily files in the formats required by the GRMs.*

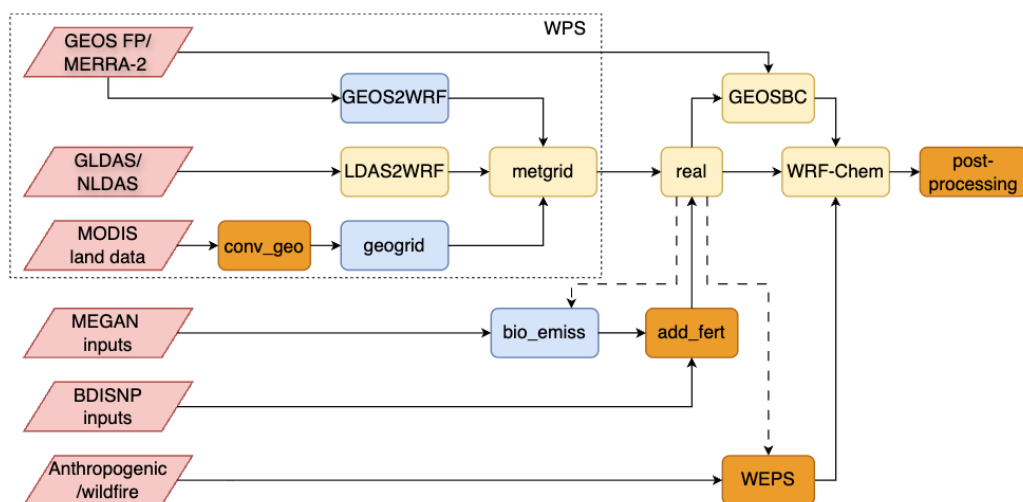

Figure 1. Flowchart of UI-WRF-Chem modeling framework. Pink parallelogram represent input datasets used, including meteorological, land surface and emission data. Rounded rectangles represent different modules and processes within the UI-WRF-Chem framework. Blue rounded rectangles denote standard WRF-Chem components without any changes, except for GEOS2WRF, which is from NASA's NU-WRF framework. Yellow round rectangles represent modified modules based on standard WRF-Chem components, except for LDAS2WRF, which is adapted from GEOS2WRF. Orange rounded rectangles indicate new modules developed in this work. The input datasets and modules enclosed within the dashed box corresponds to the WPS in the standard WRF-Chem model, where meteorological files (met\_em.d\*.nc) are generated. The conv\_geo process converts MODIS land data into binary files, for the geogrid process. Both GEOS2WRF and LDAS2WRF convert input data in the NetCDF file format to an intermediate file format, equivalent to the ungrib process. GEOSBC is adapted from the mozbc module, where GEOS FP and MERRA-2 data are used to update chemical initial and boundary conditions. The bio\_emiss module reads MEGAN emission input datasets (e.g., isoprene emission factor) and generates files (wrfbiochemi\_d0\*) for WRF-Chem to calculate biogenic emissions. The add\_fert module is used to add the BDISNP input datasets (e.g., fertilizer data) into the wrfbiochemi\_d0\* files for the real process. WEPS processes both anthropogenic and fire emission datasets and converts them into WRF-Chem-ready emission files (\*wrfchemi\*). Dashed lines from real to bio\_emiss and WEPS indicate that real needs to be executed once before running the full flow to generate wrfinput\_d0\* files, which provide domain information to these two modules.

4. Table S1. Please consider highlighting the best-performing configurations for easy comparison.

Response: Thanks for the suggestion and we have added an asterisk mark to denote the best-performing configuration for each PTA as seen in Table S1.

Table S1. A suite of UI-WRF-Chem sensitivity simulations with different options of physics schemes over CHN-Beijing, ITA-Rome, USA-LosAngeles and USA-Atlanta target areas.

| Target area | Simulation number | Microphysics | Longwave | Shortwave | PBL     |
|-------------|-------------------|--------------|----------|-----------|---------|
| Beijing     | 1*                | Lin          | RRTMG    | RRTMG     | YSU     |
|             | 2                 | Morrison     | RRTMG    | RRTMG     | YSU     |
|             | 3                 | Lin          | RRTMG    | RRTMG     | MYJ     |
|             | 4                 | Lin          | RRTM     | Goddard   | YSU     |
| Rome        | 1                 | Lin          | RRTMG    | RRTMG     | YSU     |
|             | 2*                | Morrison     | RRTMG    | RRTMG     | YSU     |
|             | 3                 | WSM6         | RRTMG    | RRTMG     | YSU     |
|             | 4                 | Morrison     | RRTMG    | RRTMG     | MYJ     |
|             | 5                 | Morrison     | RRTMG    | RRTMG     | MYNN2.5 |
|             | 6                 | Morrison     | RRTM     | Goddard   | YSU     |
| Los Angeles | 1*                | Lin          | RRTMG    | RRTMG     | YSU     |
|             | 2                 | Lin          | RRTMG    | RRTMG     | MYJ     |
|             | 3                 | Lin          | RRTM     | Goddard   | YSU     |
| Atlanta     | 1*                | Lin          | RRTMG    | RRTMG     | YSU     |
|             | 2                 | Morrison     | RRTMG    | RRTMG     | YSU     |
|             | 3                 | WSM6         | RRTMG    | RRTMG     | YSU     |
|             | 4                 | Lin          | RRTMG    | RRTMG     | MYJ     |
|             | 5                 | Lin          | RRTMG    | RRTMG     | MYNN2.5 |
|             | 6                 | Lin          | RRTM     | Goddard   | YSU     |

\*These are the final configurations selected for each PTA.

- Figure 5: The comparison may be misleading due to resolution differences—MERRA-2 is coarse and likely underestimates high PM<sub>2.5</sub> values, whereas WRF-Chem has higher resolution and better captures spatial variability. Consider interpolating WRF-Chem output to the MERRA-2 grid for a fair comparison or include scatterplots at matched resolution.

Response: We agree that it is a fair comparison to interpolate the WRF-Chem output to the MERRA-2 grid. We have regridded the WRF-Chem outputs into the MERRA-2 grid and also average the data of the sites that fall into the same MERRA-2 grid. We have updated the figure as follows:



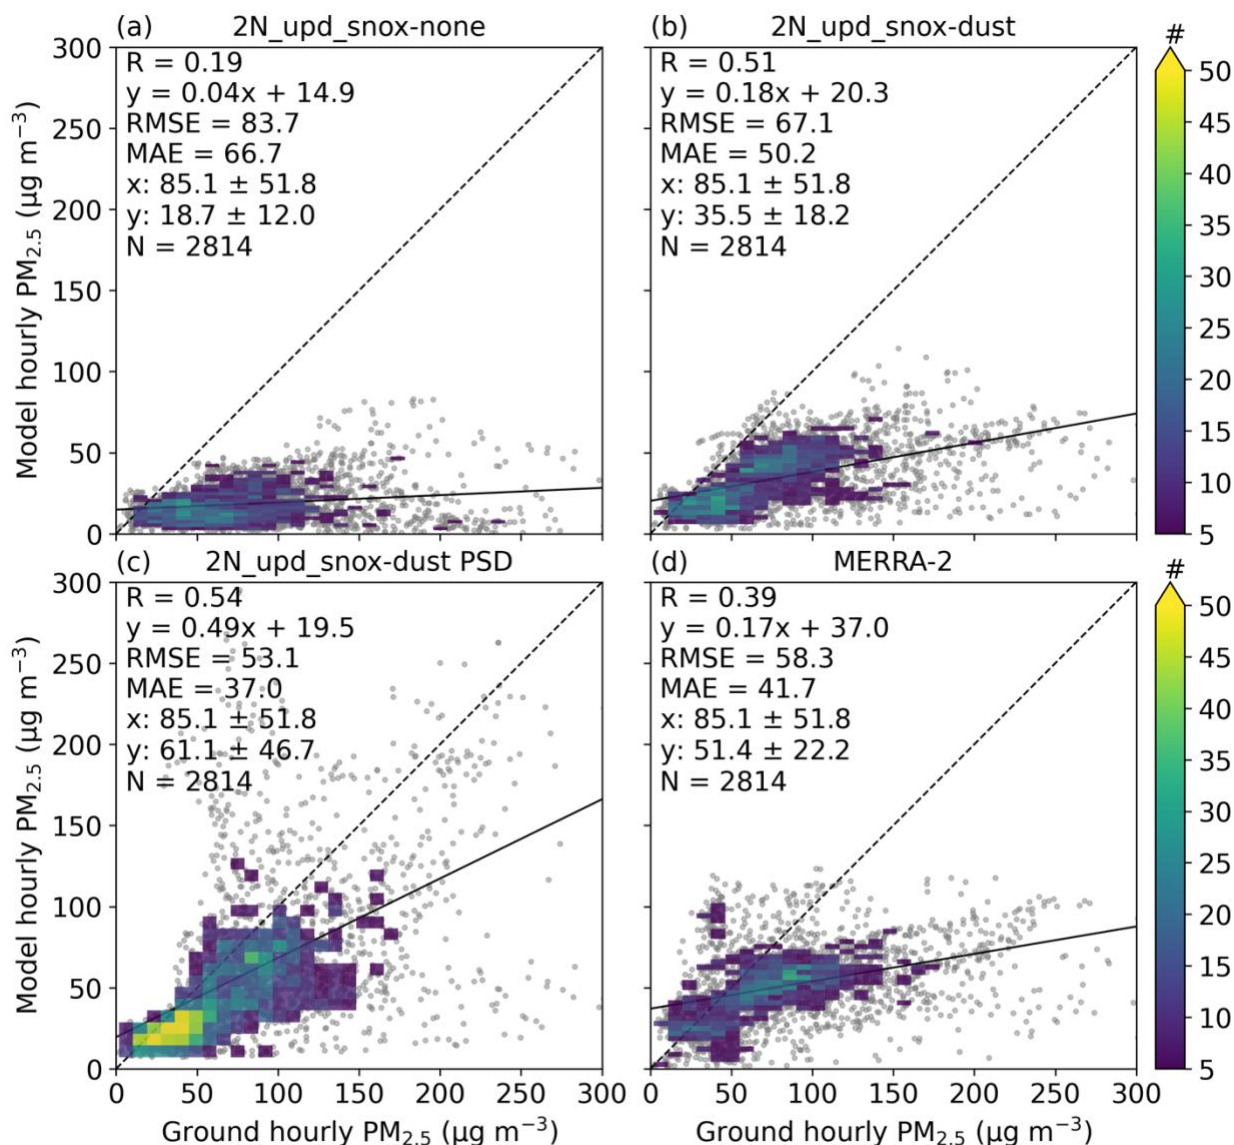

Figure 6. Scatter plot of hourly surface  $PM_{2.5}$  concentration between model (y axis) and ground observation (x axis) for surface sites in the inner domain (D2) of CHN-Beijing for 24–31 March 2018. (a)–(c) refer to the UI-WRF-Chem sensitivity simulations with different chemical boundary conditions being considered using MERRA-2 data (Table 2). (a) no chemical species, (b) dust and other aerosols and (c) same as (b) except that the dust concentration is scaled based on constraining MERRA-2 dust PSD data with AERONET PSD climatology data. (d) is from MERRA-2 simulated surface  $PM_{2.5}$  concentration. Also shown on the scatter plot is the correlation coefficient ( $R$ ), the root-mean-square error ( $RMSE$ ), the mean absolute error ( $MAE$ ), the mean  $\pm$  standard deviation for observed ( $x$ ) and model-simulated surface  $PM_{2.5}$  ( $y$ ), the number of collocated data points ( $N$ ), the density of points (the color bar), the best fit linear regression line (the solid black line) and the 1:1 line (the dashed black line). Note that WRF-Chem PM data are regridded onto the MERRA-2 grid, and when multiple surface sites fall within the same MERRA-2 grid, the observations are then averaged to represent a single collocated site.

- Figure 6: Please emphasize the observational data (e.g., bold lines or larger markers) to improve readability.



Response: Thanks for the suggestion and we have increased the size of the markers for observational data as follows:

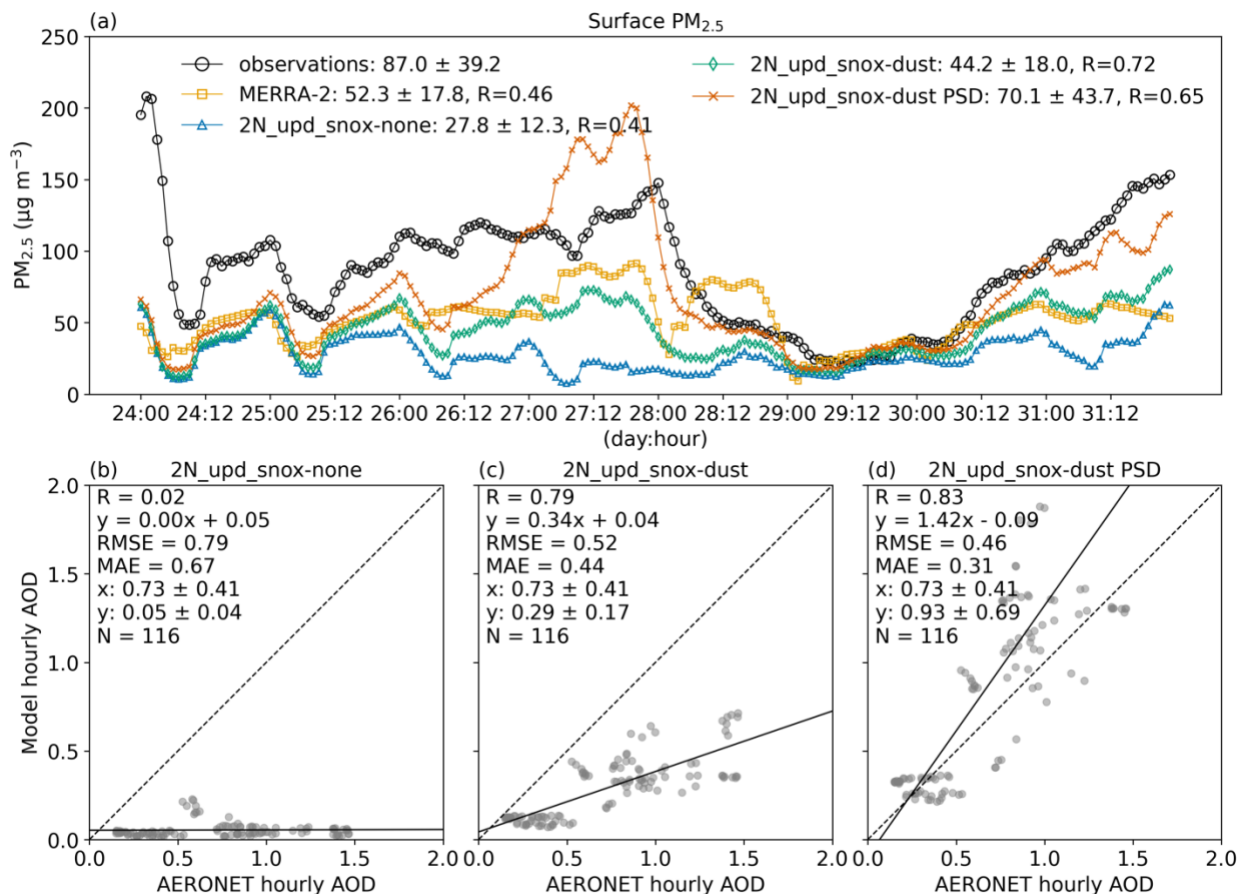

Figure 7. (a) time series of hourly surface PM<sub>2.5</sub> concentration averaged over surface sites in the inner domain (D2) of CHN-Beijing for 24–31 March 2018, from model simulations and ground observations. 2N\_upd\_snox-none/dust/dust PSD refer to the UI-WRF-Chem sensitivity simulations with different chemical boundary conditions being considered using MERRA-2 data (Table 2): no chemical species; dust and other aerosols; dust concentration is scaled based on constraining MERRA-2 dust PSD data with AERONET PSD climatology data. Also shown on the plot is the mean ± standard deviation of surface PM<sub>2.5</sub> for model simulations or observations as well as the correlation coefficient (R). (b)–(d): scatter plot of hourly AOD between model (y axis) and AERONET observation (x axis) for 24–31 March 2018. Also shown on the scatter plot is R, the root-mean-square error (RMSE), the mean absolute error (MAE), the mean ± standard deviation for observed (x) and model-simulated AOD (y), the number of collocated data points (N), the best fit linear regression line (the solid black line) and the 1:1 line (the dashed black line).

7. Line 720: Consider discussing why the updated system better captures the observed PM<sub>2.5</sub> peaks. This would strengthen the case for the model improvements.

Response: Thanks for the suggestion and we have added discussion on why the updated system better captures the observed PM<sub>2.5</sub> peaks as follows:

Time series of UI-WRF-Chem simulated hourly speciated PM<sub>2.5</sub> (e.g., OC, EC, sulfate, nitrate) and dust components in both PM<sub>2.5</sub> and PM<sub>10</sub> from the two sensitivity simulations

*(2N\_upd\_snox\_dust and 2N\_upd\_snox\_dust PSD) (not shown here) indicate that only the dust components exhibit similar peaks as in the total PM<sub>2.5</sub> and PM<sub>10</sub>, while other speciated PM<sub>2.5</sub> components do not follow the same temporal pattern. This demonstrates that the observed peaks in both PM<sub>2.5</sub> and PM<sub>10</sub> are primarily driven by the dust intrusion event. Moreover, the magnitude of the peak from the sensitivity simulation – 2N\_upd\_snox\_dust PSD is larger and matches better with surface observations, especially for PM<sub>10</sub>, than that of the 2N\_upd\_snox\_dust. This further highlights the effectiveness of our method in improving the representation of dust size distribution in MERRA-2 data.*

8. Line 1035: It would be helpful to summarize the sensitivity tests in a table for easier interpretation.

Response: Thanks for the suggestion and we have added a table (Table 3) to summarize the sensitivity tests.

Table 3. A suite of UI-WRF-Chem sensitivity simulations performed over PTA-Atlanta with different setups of microphysics and cumulus schemes for Domain 1 (D1) and Domain 2 (D2), respectively.

|                 | mp2cu5 | mp2cu5bothon | mp2cu3bothon | mp10cu5  | mp10cu5bothon | mp10cu3bothon |
|-----------------|--------|--------------|--------------|----------|---------------|---------------|
| Microphysics-D1 | Lin    | Lin          | Lin          | Morrison | Morrison      | Morrison      |
| Microphysics-D2 | Lin    | Lin          | Lin          | Morrison | Morrison      | Morrison      |
| Cumulus-D1      | G3D    | G3D          | GF           | G3D      | G3D           | GF            |
| Cumulus-D2      | off    | G3D          | GF           | off      | G3D           | GF            |

9. MAIA compositional data: Since MAIA will retrieve PM component information, the paper should demonstrate how UIWRF-Chem simulates PM species. It would be useful to show comparisons against ground-based observations (e.g., from the IMPROVE network).

Response: Thank you for bringing up this point. We agree that it is valuable to demonstrate how UI-WRF-Chem simulates PM species. As an example, we have evaluated the UI-WRF-Chem simulated sulfate + nitrate, EC, OC and dust against both IMPROVE and CSN networks over Atlanta PTA (Figure 15, Figure S17 and Figure S18). At the time of writing, speciation data for some non-US PTAs are not yet available and we do not have sufficient modeling data to evaluate the model performance either. We have recently completed one year of UI-WRF-Chem simulations for each PTA. Our ongoing work focuses on evaluating model performances for total PM, speciated PM<sub>2.5</sub> and AOD, which will provide a comprehensive assessment. We have added Section 4.4.2 for the analysis of the composition and please see the updated manuscript.

10. Significance testing: The paper discusses improved performance for certain configurations but lacks significance tests to demonstrate that the improvements are statistically meaningful. This is important to ensure the optimal setup is not case-specific.

Response: Thank you for the suggestion again to improve our analysis. We have first added Sect 3.1 Evaluation statistics to describe the methods used to conduct the significance tests. These significance tests are then applied in the different case studies to evaluate whether the improvement is statistically significant (please see the updated manuscript). Below is Sect 3.1:

### 3.1 Evaluation statistics

*Several statistics are used to evaluate the model performance against ground and satellite observations, including linear correlation coefficient (R), root mean square error (RMSE), mean bias (MB), normalized mean bias (NMB), mean absolute error (MAE), normalized standard deviation (NSD) and normalized centered root mean square error (NCRMSE). NSD is the ratio of the standard deviation of the model simulation to the standard deviation of the observation. NCRMSE is like RMSE except that the impact of the bias is removed. Some of these statistics are summarized in a Taylor Diagram (Taylor, 2001), which includes R (shown as the cosine of the polar angle), NSD (shown as the radius from the quadrant center), and NCRMSE (shown as the radius from the expected point, which is located at the point where R and NSD are unity).*

*To determine whether the performances among model sensitivity simulations for different case studies over different target areas are statistically significant, we conduct the paired t-test on collocated model-observation samples or between model simulations. We focus on the MAE as the evaluation metric. For comparison of hourly data, we account for the temporal autocorrelation by estimating the lag-1 autocorrelation and applying the effective sample size adjustment (Wilks, 2011). For cases with smaller sample size, we also apply the non-parametric Wilcoxon signed rank test (e.g., Menut et al., 2019; Tao et al., 2025) to ensure the robustness of our test. In addition, when multiple model sensitivity simulations are evaluated, we apply a Bonferroni correction procedure (SIMES, 1986) to both paired-t and Wilcoxon tests, following previous work (Crippa et al., 2017). Under this approach, the null hypothesis is rejected if  $p \leq \frac{\alpha}{m}$ , where p is the raw p value,  $\alpha$  is the significance level (0.05 in this study) and m is the number of hypothesis tests. For testing the significance over spatial maps, where a large number of tests are performed simultaneously, we instead apply the Benjamini-Hochberg false discovery rate (FDR) correction (Benjamini & Hochberg, 1995). We hence report adjusted p-value throughout this work unless noted otherwise.*

## RC2:

Zhang et al. present UI-WRF-Chem, a set of unified inputs (initial and boundary conditions) for WRF-Chem in support of the MAIA satellite mission. UI-WRF-Chem provides meteorological inputs as well as emissions; land surface data; and a new soil NO<sub>x</sub> emissions scheme. A new chemistry scheme based on MADE/SORGAM is also developed, MADE/SORGAM-DustSS, to incorporate GOCART-AFWA emission scheme for matching with the MERRA-2/GEOS-FP dust size bins.

The manuscript details many improvements to provide inputs to WRF-Chem. Of particular note is the development of WEPS as an emissions pre-processor which resolves a point of frustration in offline emissions processing for WRF-Chem. In addition, to support the MAIA satellite mission, UI-WRF-Chem extensively incorporates data from GEOS-FP and MERRA-2 products to the WRF-Chem model pipeline and evaluates many of these developments. These improvements have also been validated in four extensive case studies across the globe. The manuscript is well written and I recommend its publication.

**Response:** We sincerely thank the reviewer for spending the time and effort providing valuable feedback to improve our manuscript and we truly appreciate their recognition of our work.

Major comments:

1. The authors evaluate throughout the effect of incorporating "MERRA-2 chemical boundary conditions" into the simulation. Just to confirm that the simulations marked "none" mean zero boundary conditions are input; is this usual in WRF-Chem simulations? Does the common approach of using CAM-chem/WACCM outputs as boundary conditions provide no information for the dust and other aerosols in a WRF-Chem simulation? If CAM-chem/WACCM, as global models, can provide some kind of information, I think it would be a more fair comparison as to whether these conditions can/can not help the regional model capture the long-range transport event.

**Response:** We thank the reviewer for this insightful comment and the opportunity to clarify. In our work, the simulations marked "none" indicate that no chemical boundary conditions from MERRA-2 are used. Instead, the model applies its default chemical boundary conditions which represent a clean North American summery day and includes a limited number of mostly gas-phase species. This default setting was originally developed for tropospheric ozone forecast. For aerosol species, the concentration values are close to zero. We have added this clarification to the caption of Table 2. We also note that the common approach of using CAM-Chem/WACCM outputs as boundary conditions does provide information for dust and other aerosols.

We agree with the reviewer that comparing MERRA-2 chemical boundary conditions to an alternative global model such as CAM-Chem/WACCM could provide a more direct assessment of how using different global models influence the representation of long-range transport. In this study, we chose the "none" case as the baseline run to directly quantify the contribution from MERRA-2 chemical boundary conditions. Our focus was on improving the representation of dust size distribution in MERRA-2. We recognize that different studies have adopted different

global models as chemical boundary conditions depending on the research scope and a comprehensive assessment of WRF-Chem's sensitivity to these choices would provide valuable insights to the community.

We have also included the following sentences in Sect 5 Conclusion and Discussion to clarify this point:

*Since our work mainly focuses on improving the representation of the dust size distribution in MERRA-2 data, we recognize that other global models such as CAM-Chem may also provide useful information for chemical boundary conditions in different applications. While a comprehensive understanding of how different global models affect WRF-Chem simulations of special events such as the dust long-range transport, would provide valuable insights to the community, our work here demonstrates an efficient way for improving the simulation of dust transport using WRF-Chem.*

2. UI-WRF-Chem extensively integrates outputs from GEOS-FP and MERRA-2 as inputs for WRF-Chem; many of these improvements are not trivial, e.g., the updates to land input data, a new soil NO<sub>x</sub> emissions scheme, etc... Do the authors plan to contribute this capability to WPS and the WRF mainline model code in the future?

Response: Thank you for the affirmation and bringing up this point. We are planning to update the UI-WRF-Chem modeling framework with a newer version of the WRF-Chem code, and we consider sharing the updates such as the soil NO<sub>x</sub> emissions scheme with the mainline model code.

3. WEPS builds on the existing WRF-Chem emissions processing tools to incorporate several global inventories, as well as allowing NEI and MEIC inventories to replace the global inventory. Is the process of regional inventories to override the global inventory an automated process (i.e., a regional netCDF file can be supplied and it'll overwrite the global inventory?) like in GEOS-Chem's emissions tool, HEMCO, or code changes will be needed? How extensible is WEPS to update with further inventories, and how easy is it to update inventories in the future? For example, I noted that FINN v1.01 is supported but not the more recent FINN v2.5 - will WEPS enable an easier update of the inventories for ingestion into WRF-Chem?

Response: Thank you for the question. The approach used by WEPS is like HEMCO to some extent. In WEPS, a namelist file is used to specify the emission inventory to be used, whether it is a global emission inventory or a specific regional emission inventory such as NEI. The extent of code modifications required depends on the format of the raw emission inventories. For example, we have successfully ingested the global emission inventory EDGAR-HTAP 2010, EDGAR 2015 and EDGAR-HTAP 2020 using the same code with minimal modifications as they share similar formats. Currently, WEPS has the capability to ingest emission inventories in both netcdf and text file formats. We anticipate that WEPS will allow an easy integration of an alternative wildfire or anthropogenic emission inventory by adapting the current code.

4. I also suggest some presentation improvements: organize the best configuration (of model physics) for each case study domain in a table; also label in the figures the D1 and D2 domains

for each case study; at times D1 is the whole region and D1 is marked by a rectangle and inset text could help the reader.

Response: Thank you for the suggestion to improve the presentation of the manuscript. We have first improved Table S1 by adding asterisk marks to denote the best-performing configuration of physics scheme for each target area. We have also added a table (Table 1) to summarize the best configuration of physics scheme selected together with other model set up such as land surface model and emission schemes for each target area studied. We have also improved figures with maps to clearly denote D1 and D2 (please see the figures in the updated manuscript).

Table S1. A suite of UI-WRF-Chem sensitivity simulations with different options of physics schemes over CHN-Beijing, ITA-Rome, USA-LosAngeles and USA-Atlanta target areas.

| Target area | Simulation number | Microphysics | Longwave | Shortwave | PBL     |
|-------------|-------------------|--------------|----------|-----------|---------|
| Beijing     | 1*                | Lin          | RRTMG    | RRTMG     | YSU     |
|             | 2                 | Morrison     | RRTMG    | RRTMG     | YSU     |
|             | 3                 | Lin          | RRTMG    | RRTMG     | MYJ     |
|             | 4                 | Lin          | RRTM     | Goddard   | YSU     |
| Rome        | 1                 | Lin          | RRTMG    | RRTMG     | YSU     |
|             | 2*                | Morrison     | RRTMG    | RRTMG     | YSU     |
|             | 3                 | WSM6         | RRTMG    | RRTMG     | YSU     |
|             | 4                 | Morrison     | RRTMG    | RRTMG     | MYJ     |
|             | 5                 | Morrison     | RRTMG    | RRTMG     | MYNN2.5 |
|             | 6                 | Morrison     | RRTM     | Goddard   | YSU     |
| Los Angeles | 1*                | Lin          | RRTMG    | RRTMG     | YSU     |
|             | 2                 | Lin          | RRTMG    | RRTMG     | MYJ     |
|             | 3                 | Lin          | RRTM     | Goddard   | YSU     |
| Atlanta     | 1*                | Lin          | RRTMG    | RRTMG     | YSU     |
|             | 2                 | Morrison     | RRTMG    | RRTMG     | YSU     |
|             | 3                 | WSM6         | RRTMG    | RRTMG     | YSU     |
|             | 4                 | Lin          | RRTMG    | RRTMG     | MYJ     |
|             | 5                 | Lin          | RRTMG    | RRTMG     | MYNN2.5 |
|             | 6                 | Lin          | RRTM     | Goddard   | YSU     |

\*These are the final configurations selected for each PTA.

Table 2. A summary of model physics, chemistry and emissions configurations for CHN-Beijing, ITA-Rome, USA-LosAngeles, and USA-Atlanta target areas.

| Category  | Model component                | CHN-Beijing                    | ITA-Rome       | USA-Los Angeles | USA-Atlanta |
|-----------|--------------------------------|--------------------------------|----------------|-----------------|-------------|
| Physics   | Microphysics                   | Lin                            | Morrison       | Lin             | Lin         |
|           | Cumulus                        | G3D                            | G3D            | G3D             | G3D         |
|           | Longwave radiation             | RRTMG                          | RRTMG          | RRTMG           | RRTMG       |
|           | Shortwave radiation            | RRTMG                          | RRTMG          | RRTMG           | RRTMG       |
|           | Planetary boundary layer       | YSU                            | YSU            | YSU             | YSU         |
|           | Surface layer                  | Revised MM5                    |                |                 |             |
|           | Land surface model             | NOAH                           | NOAH           | NOAH            | NOAH        |
| Chemistry | Gas-phase                      | RADM2                          | RADM2          | RADM2           | RADM2       |
|           | Aerosols                       | MADE/SORAGM-DustSS             |                |                 |             |
|           | Photolysis                     | Madronich F-TUV                |                |                 |             |
| Emissions | Anthropogenic emissions        | MEIC 2016                      | HTAP v3 (2018) | NEI 2017        | NEI 2017    |
|           | Dust emissions                 | GOCART with AFWA modifications |                |                 |             |
|           | Biogenic emissions of VOCs     | MEGAN                          | MEGAN          | MEGAN           | MEGAN       |
|           | Soil NO <sub>x</sub> emissions | BDISNP                         | BDISNP         | BDISNP          | BDISNP      |
|           | Wildfire emissions             | FLAMBE                         | FLAMBE         | FLAMBE          | FLAMBE      |

Specific/Minor comments:

L40: "because of" -> I suggest "enabled by".

Response: Thank you for the suggestion. We have replaced “because of” with “enabled by”.

L223-225: It's not clear what the paragraph is suggesting here. Are you suggesting that the manuscript's use of GEOS-FP and MERRA2 differs from the common practice of using CAM-chem/WACCM outputs as chemical IC/BC (which I believe is the common practice in the WRF-Chem user's guide) or that GEOS-FP and MERRA-2 are different in that they assimilate satellite-based aerosol fields? I would suggest revising this paragraph for clarity.

Response: Thank you for the question and suggestion to make this paragraph clear. We meant the use of the GEOS-FP and MERRA-2 is different from other work in the sense that they assimilate satellite-based aerosol fields. We have revised this paragraph as follows:

*We have developed the capability to use GEOS FP and MERRA-2 data to provide chemical initial and boundary conditions in our UI-WRF-Chem modelling framework. Since WRF-Chem is a regional chemical transport model, time-varying chemical boundary conditions from global*



*chemical transport models are typically used to specify concentrations of different chemical species at the domain boundaries. This is especially important for long-lived chemical species, such as O<sub>3</sub>, or capturing regional or long-range transport events. The common practice is to use global model outputs such as the Community Atmosphere Model with Chemistry, CAM-Chem (Emmons et al., 2020) for reanalysis or the Whole Atmosphere Community Climate Model (WACCM) (Gettelman et al., 2019) for forecasts. Unlike CAM-Chem or WACCM, which do not assimilate satellite aerosol observations, GEOS FP and MERRA-2 incorporate satellite-based aerosol data assimilation, which provides observational constraints for the day-to-day variations in aerosol concentrations over a given domain. To leverage this unique capability, we have modified the WRF-Chem preprocessor tool – mozbc (<https://www2.acom.ucar.edu/wrf-chem/wrf-chem-tools-community>) to create the GEOSBC module (Fig 1), enabling direct ingestion of GEOS FP and MERRA-2 data for updating chemical initial and boundary conditions.*

L425: "sea seal" -> "sea salt"?

Response: We have fixed it.

L446: "relative humanity" -> "relative humidity"?

Response: We have fixed it.

L519: "the chemistry will be transported..." -> maybe "the chemical tracers will be transported"?

Response: Yes, we agree. We have changed it to “the chemical species will be transported”.

SI Table S1 Los Angeles Simulation #1: "Li" -> "Lin"

Response: We have fixed it.

## References:

- Benjamini, Y., & Hochberg, Y. (1995). Controlling the false discovery rate: a practical and powerful approach to multiple testing. *Journal of the Royal statistical society: series B (Methodological)*, 57(1), 289-300.
- Crippa, P., Sullivan, R. C., Thota, A., & Pryor, S. C. (2017). The impact of resolution on meteorological, chemical and aerosol properties in regional simulations with WRF-Chem. *Atmospheric Chemistry and Physics*, 17(2), 1511-1528.
- Gettelman, A., Mills, M. J., Kinnison, D. E., Garcia, R. R., Smith, A. K., Marsh, D. R., Tilmes, S., Vitt, F., Bardeen, C. G., McInerney, J., Liu, H.-L., Solomon, S. C., Polvani, L. M., Emmons, L. K., Lamarque, J.-F., Richter, J. H., Glanville, A. S., Bacmeister, J. T., Phillips, A. S., Neale, R. B., Simpson, I. R., DuVivier, A. K., Hodzic, A., and Randel, W. J.: The Whole Atmosphere Community Climate Model Version 6 (WACCM6), *Journal of Geophysical Research: Atmospheres*, 124, 12380-12403, <https://doi.org/10.1029/2019JD030943>, 2019.
- Grell, G. A. and Freitas, S. R.: A scale and aerosol aware stochastic convective parameterization for weather and air quality modeling, *Atmospheric Chemistry and Physics*, 14, 5233-5250, 2014.
- Kain, J. S.: The Kain–Fritsch Convective Parameterization: An Update, *Journal of Applied Meteorology*, 43, 170-181, [https://doi.org/10.1175/1520-0450\(2004\)043<0170:TKCPAU>2.0.CO;2](https://doi.org/10.1175/1520-0450(2004)043<0170:TKCPAU>2.0.CO;2), 2004.
- Li, Y., Pickering, K. E., Barth, M. C., Bela, M. M., Cummings, K. A., and Allen, D. J.: Evaluation of Parameterized Convective Transport of Trace Gases in Simulation of Storms Observed During the DC3 Field Campaign, *Journal of Geophysical Research: Atmospheres*, 123, 11,238-211,261, <https://doi.org/10.1029/2018JD028779>, 2018.
- Li, Y., Pickering, K. E., Barth, M. C., Bela, M. M., Cummings, K. A., and Allen, D. J.: Wet Scavenging in WRF-Chem Simulations of Parameterized Convection for a Severe Storm During the DC3 Field Campaign, *Journal of Geophysical Research: Atmospheres*, 124, 7413-7428, <https://doi.org/10.1029/2019JD030484>, 2019.
- Menut, L., Tuccella, P., Flamant, C., Deroubaix, A., & Gaetani, M. (2019). The role of aerosol–radiation–cloud interactions in linking anthropogenic pollution over southern west Africa and dust emission over the Sahara. *Atmos. Chem. Phys.*, 19(23), 14657-14676. <https://doi.org/10.5194/acp-19-14657-2019>
- Peters-Lidard, C. D., Kemp, E. M., Matsui, T., Santanello, J. A., Kumar, S. V., Jacob, J. P., Clune, T., Tao, W.-K., Chin, M., Hou, A., Case, J. L., Kim, D., Kim, K.-M., Lau, W., Liu, Y., Shi, J., Starr, D., Tan, Q., Tao, Z., Zaitchik, B. F., Zavodsky, B., Zhang, S. Q., and Zupanski, M.: Integrated modeling of aerosol, cloud, precipitation and land processes at satellite-resolved scales, *Environmental Modelling & Software*, 67, 149-159, <https://doi.org/10.1016/j.envsoft.2015.01.007>, 2015.

SIMES, R. J. (1986). An improved Bonferroni procedure for multiple tests of significance. *Biometrika*, 73(3), 751-754. <https://doi.org/10.1093/biomet/73.3.751>

Tao, M., Fiore, A. M., Karambelas, A., Miller, P. J., Valin, L. C., Judd, L. M., Tzortziou, M., Whitehill, A., Teora, A., Tian, Y., Civerolo, K. L., Tong, D., Ma, S., Adamo, S. B., & Holloway, T. (2025). Insights Into Summertime Surface Ozone Formation From Diurnal Variations in Formaldehyde and Nitrogen Dioxide Along a Transect Through New York City. *Journal of Geophysical Research: Atmospheres*, 130(9), e2024JD040922. <https://doi.org/https://doi.org/10.1029/2024JD040922>

Taylor, K. E.: Summarizing multiple aspects of model performance in a single diagram, *Journal of Geophysical Research: Atmospheres*, 106, 7183-7192, 2001.

Wilks, D. S. (2011). Chapter 9 - Time Series. In D. S. Wilks (Ed.), *International Geophysics* (Vol. 100, pp. 395-456). Academic Press. <https://doi.org/https://doi.org/10.1016/B978-0-12-385022-5.00009-9>
